# Supplementary material for: Loss of PHF6 causes spontaneous seizures, enlarged brain ventricles and altered transcription in the cortex of a mouse model of the Börjeson–Forssman–Lehmann intellectual disability syndrome
Source: PubMed Central journal article supplement (PMC11478892; doi:10.1371/journal.pgen.1011428), 2024-10-15
Supplement: pgen.1011428.s002.pdf [file pgen.1011428.s002.pdf]

**S2 Table: Effect of *Phf6* germline mutation on survival on the C57BL/6 background**

| Age               | Females                    |                            | Males                     |                           | Total number | p-value for <i>Phf6</i> <sup>-Y</sup> males | p-value for <i>Phf6</i> <sup>+/-</sup> females |
|-------------------|----------------------------|----------------------------|---------------------------|---------------------------|--------------|---------------------------------------------|------------------------------------------------|
|                   | <i>Phf6</i> <sup>+/+</sup> | <i>Phf6</i> <sup>+/-</sup> | <i>Phf6</i> <sup>+Y</sup> | <i>Phf6</i> <sup>-Y</sup> |              |                                             |                                                |
| Post-natal day 0  | 57 27%                     | 57 27%                     | 96 46%                    | 0 0%                      | 210          | < 10 <sup>-6</sup>                          | 0.79                                           |
| Weaning (3 weeks) | 54 31%                     | 42 24%                     | 79 45%                    | 0 0%                      | 175          | < 10 <sup>-6</sup>                          | 0.42                                           |

The number and percentage of each genotype from crosses between *Phf6*<sup>+/-</sup> heterozygous females with *Phf6*<sup>+Y</sup> males is shown. The expected frequency of each genotype is 25%. Data were analysed by a binomial test. P-values are shown for the representation of the *Phf6*<sup>-Y</sup> and *Phf6*<sup>+/-</sup> genotypes.
