# Supplementary material for: Loss of PHF6 causes spontaneous seizures, enlarged brain ventricles and altered transcription in the cortex of a mouse model of the Börjeson–Forssman–Lehmann intellectual disability syndrome
Source: PubMed Central journal article supplement (PMC11478892; doi:10.1371/journal.pgen.1011428), 2024-10-15
Supplement: pgen.1011428.s008.pdf [file pgen.1011428.s008.pdf]

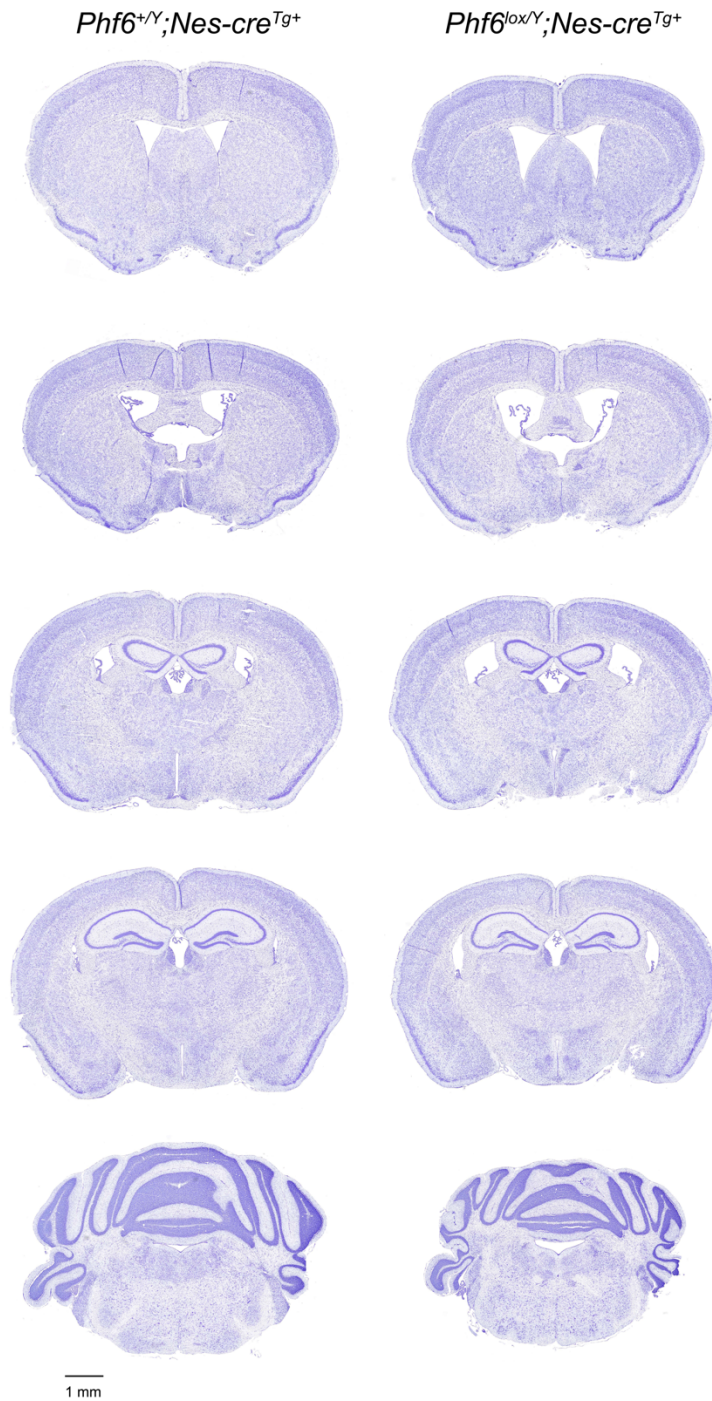

**S3 Fig: Histology of adult seizure-affected *Phf6<sup>lox/Y</sup>;Nes-cre<sup>Tg/+</sup>* and *Phf6<sup>+/Y</sup>;Nes-cre<sup>Tg/+</sup>* control brains**

Representative images showing matched 10  $\mu$ m brain sections of a *Phf6<sup>lox/Y</sup>;Nes-cre<sup>Tg/+</sup>* and a *Phf6<sup>+/Y</sup>;Nes-cre<sup>Tg/+</sup>* brain stained with cresyl violet. Serial sections of N = 3 *Phf6<sup>lox/Y</sup>;Nes-cre<sup>Tg/+</sup>* mice 17-37 days after onset of seizures and 3 age-matched *Phf6<sup>+/Y</sup>;Nes-cre<sup>Tg/+</sup>* control mice (394 to 483 days old) were examined.

Scale bar = 1 mm.
