# Supplementary material for: Loss of PHF6 causes spontaneous seizures, enlarged brain ventricles and altered transcription in the cortex of a mouse model of the Börjeson–Forssman–Lehmann intellectual disability syndrome
Source: PubMed Central journal article supplement (PMC11478892; doi:10.1371/journal.pgen.1011428), 2024-10-15
Supplement: pgen.1011428.s010.pdf [file pgen.1011428.s010.pdf]

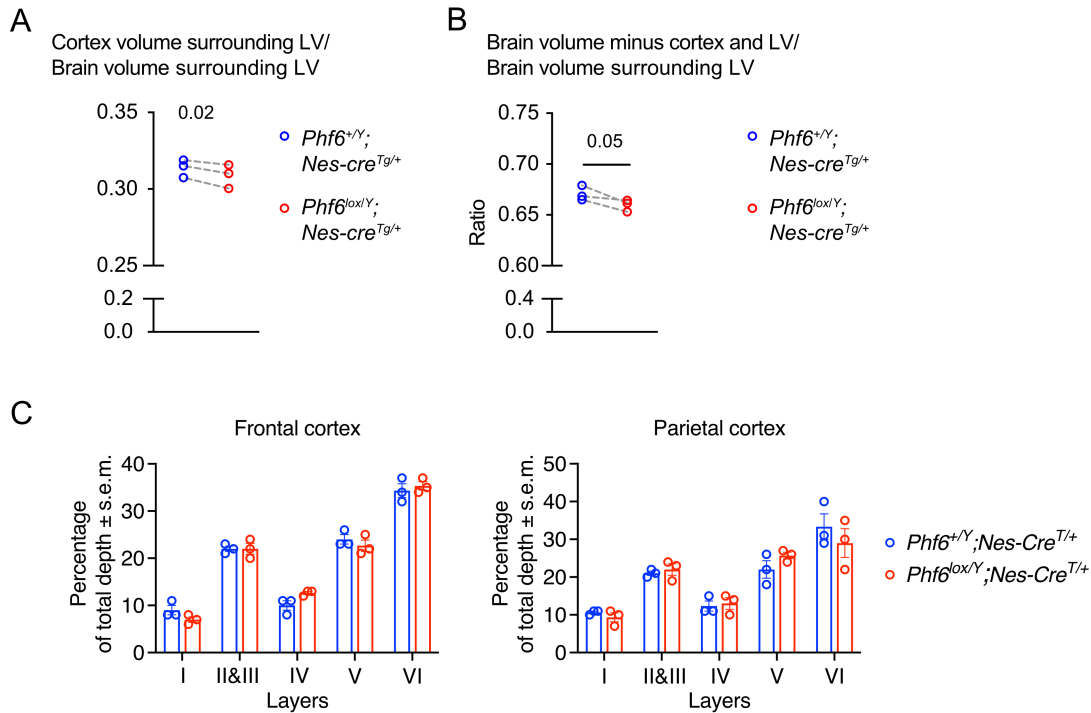

**S5 Fig: Reduction in cortex volume and other regions of the brain caused by loss of PHF6**

(A) Volume of the cerebral cortex divided by the volume of the total brain in the sections surrounding the lateral ventricles is slightly reduced in *Phf6<sup>lox/Y</sup>;Nes-cre<sup>Tg/+</sup>* vs. *Phf6<sup>+/Y</sup>;Nes-cre<sup>Tg/+</sup>* brains.

(B) Volume of the rest of the brain (i.e., minus the cortex and lateral ventricles), divided by the volume of the total brain in the sections surrounding the lateral ventricles in *Phf6<sup>lox/Y</sup>;Nes-cre<sup>Tg/+</sup>* vs. *Phf6<sup>+/Y</sup>;Nes-cre<sup>Tg/+</sup>* brains.

LV = lateral ventricles.

(C) Depth of individual cortical layers as percentage of total cortex depth in *Phf6<sup>lox/Y</sup>;Nes-cre<sup>Tg/+</sup>* vs. *Phf6<sup>+/Y</sup>;Nes-cre<sup>Tg/+</sup>* brains.

N = 3 *Phf6<sup>lox/Y</sup>;Nes-cre<sup>Tg/+</sup>* vs. 3 *Phf6<sup>+/Y</sup>;Nes-cre<sup>Tg/+</sup>* mice (aged 394 to 483 days old). Circles represent individual animals (A-C). Lines between individual data points join each *Phf6<sup>lox/Y</sup>;Nes-cre<sup>Tg/+</sup>* animal to its paired control (A,B). Data (C) are presented as mean  $\pm$  sem. Data were analyzed by a paired t-test (A,B) or unpaired two-tailed t-test (C).
