# Supplementary material for: Loss of PHF6 causes spontaneous seizures, enlarged brain ventricles and altered transcription in the cortex of a mouse model of the Börjeson–Forssman–Lehmann intellectual disability syndrome
Source: PubMed Central journal article supplement (PMC11478892; doi:10.1371/journal.pgen.1011428), 2024-10-15
Supplement: pgen.1011428.s014.pdf [file pgen.1011428.s014.pdf]

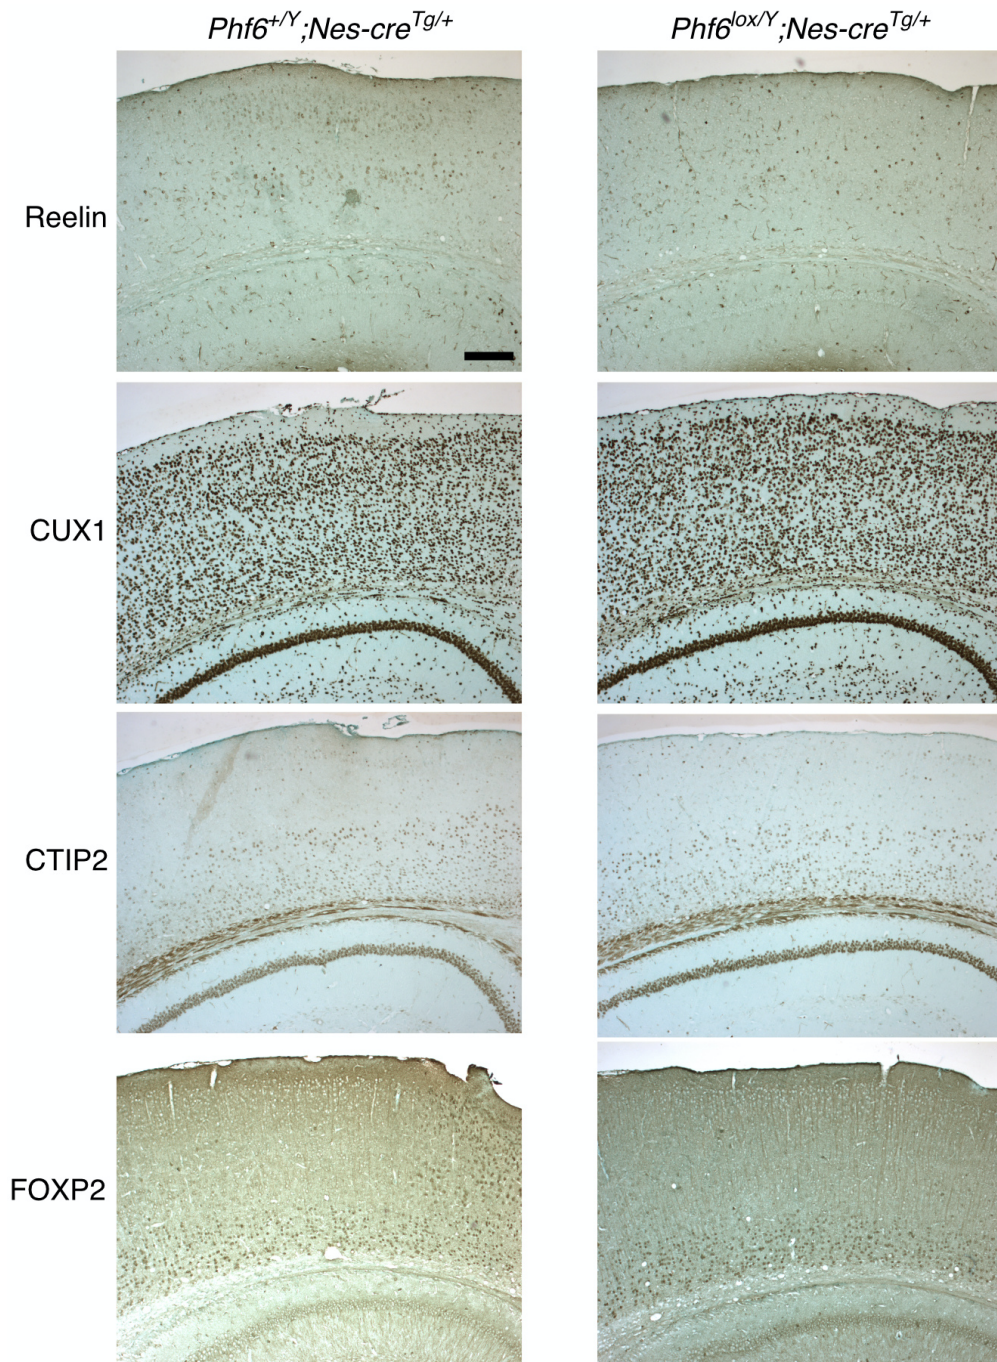

**S9 Fig: Cortical layering of the adult cortex is unaffected by loss of *Phf6***

Representative images of immunohistochemistry staining for reelin, CUX1 (layers II-V), CTIP2 (layers V-VI) and FOXP2 (layer VI) of sections of the parietal cortex of 13-14-week-old *Phf6*<sup>lox/*Y*</sup>; *Nes-cre*<sup>Tg/+</sup> vs. *Phf6*<sup>+/*Y*</sup>; *Nes-cre*<sup>Tg/+</sup> mice. N = 3 mice per genotype. Scale bar = 180  $\mu$ m.
