# Supplementary material for: Loss of PHF6 causes spontaneous seizures, enlarged brain ventricles and altered transcription in the cortex of a mouse model of the Börjeson–Forssman–Lehmann intellectual disability syndrome
Source: PubMed Central journal article supplement (PMC11478892; doi:10.1371/journal.pgen.1011428), 2024-10-15
Supplement: pgen.1011428.s016.pdf [file pgen.1011428.s016.pdf]

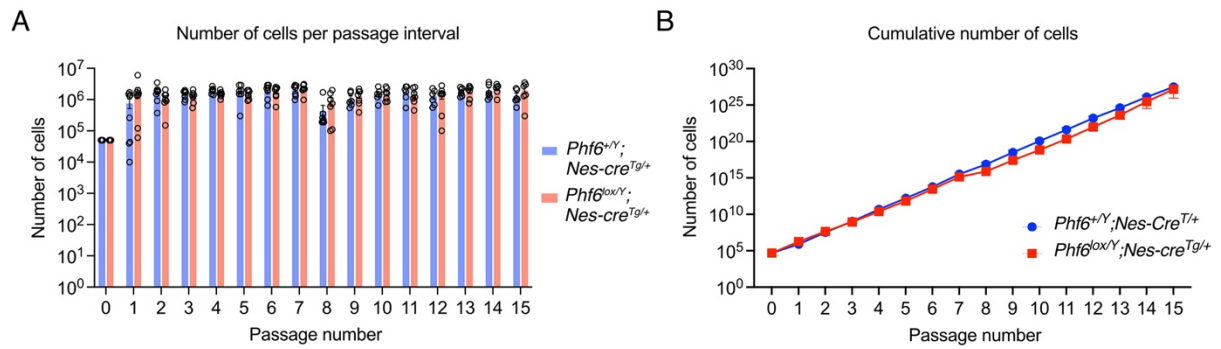

### S11 Fig: Loss of PHF6 does not affect neural stem and progenitor proliferation

(A,B) Cell proliferation parameters from passage 0 (primary isolation and plating) to passage 13 of neural stem and progenitor cells (NSPCs) isolated from the dorsal telencephalon of E12.5 *Phf6*<sup>lox/Y</sup>; *Nes-cre*<sup>Tg/+</sup> vs. *Phf6*<sup>+/Y</sup>; *Nes-cre*<sup>Tg/+</sup> embryos.

(A) Cell yield at each consecutive passage after plating 50,000 cells per well of 6-well tissue culture dishes.

(B) Cumulative cell growth.

N = NSPC isolates from 8 embryos per genotype. Data are presented as mean ± sem (A,B).

Circles represent cells isolated from individual embryos (A). Data were analysed by two-way-ANOVA with genotype and passage number as the two independent factors.
