# Supplementary material for: Loss of PHF6 causes spontaneous seizures, enlarged brain ventricles and altered transcription in the cortex of a mouse model of the Börjeson–Forssman–Lehmann intellectual disability syndrome
Source: PubMed Central journal article supplement (PMC11478892; doi:10.1371/journal.pgen.1011428), 2024-10-15
Supplement: pgen.1011428.s019.pdf [file pgen.1011428.s019.pdf]

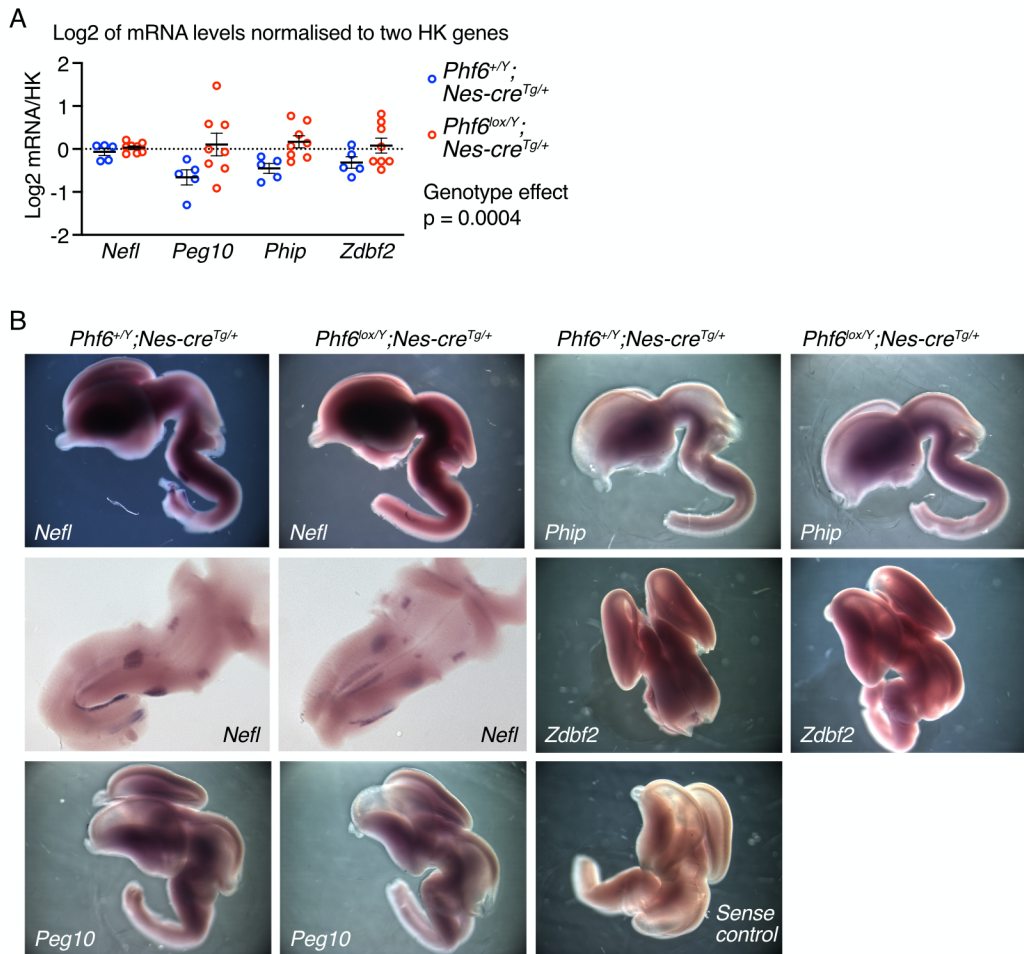

**S14 Fig: Additional assessment of the expression of selected genes identified as differentially expressed between *Phf6* deleted and control samples by RNA-sequencing**

(A) RT-qPCR of *Phf6*<sup>lox/Y</sup>; *Nes-cre*<sup>Tg/+</sup> vs. *Phf6*<sup>+/Y</sup>; *Nes-cre*<sup>Tg/+</sup> E15.5 cortex.

As in the RNA-sequencing dataset, mRNA levels for the selected genes were higher in the *Phf6*<sup>lox/Y</sup>; *Nes-cre*<sup>Tg/+</sup> vs. *Phf6*<sup>+/Y</sup>; *Nes-cre*<sup>Tg/+</sup> cortex.

(B) Representative images of RNA/RNA whole mount in situ hybridisation of E15.5 *Phf6*<sup>lox/Y</sup>; *Nes-cre*<sup>Tg/+</sup> vs. *Phf6*<sup>+/Y</sup>; *Nes-cre*<sup>Tg/+</sup> brains using RNA probes as indicated.

N = 5-8 tissue samples per genotype. Data are presented as mean  $\pm$  sem (A). Data from individual foetuses are represented as open circles (A). Data were analysed by two-way ANOVA (A).
